# Supplementary material for: ANXA1 promotes intrahepatic cholangiocarcinoma proliferation and growth by regulating glutamine metabolism through GOT1 stabilization
Source: Springer Nature journal article supplement (doi:10.1186/s13046-025-03400-z), 2025-05-19
Supplement: MOESM4 [file 13046_2025_3400_MOESM4_ESM.pdf]

# Supplementary Figures

Figure S1

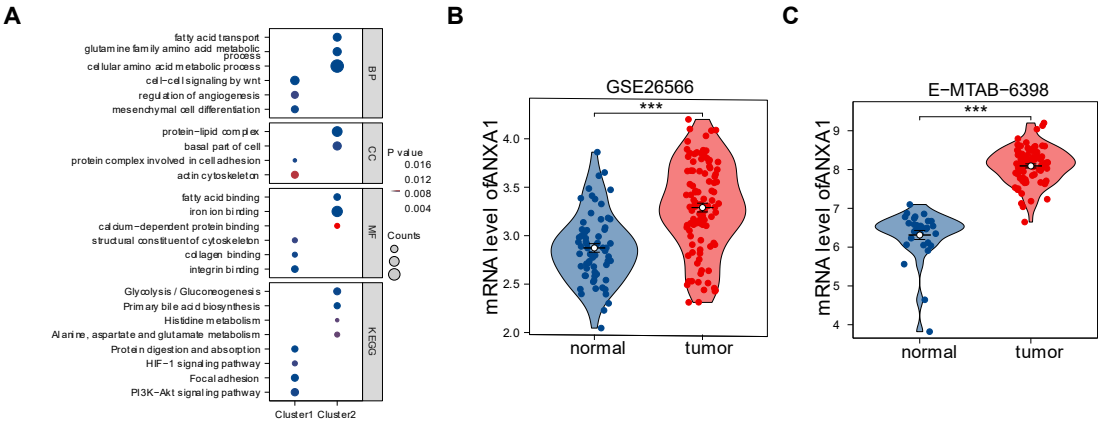

A: GO and KEGG enrichment analysis of genes with differences in two metabolic types based on biological analysis.

B-C: The expression levels of ANXA1 mRNA in the public databases GSE26566 and E-MTAB-6398. (Mann–Whitney U test, \*\*\*, p<0.001)

Figure S2

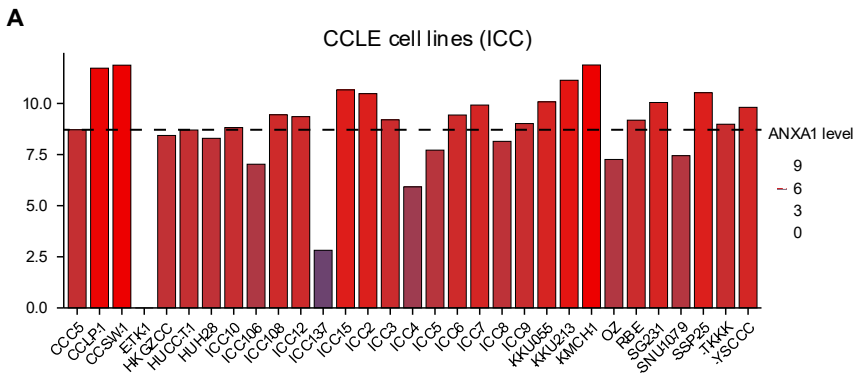

A: mRNA levels of ANXA1 in intrahepatic cholangiocarcinoma cell lines from CCLE.

Figure S3

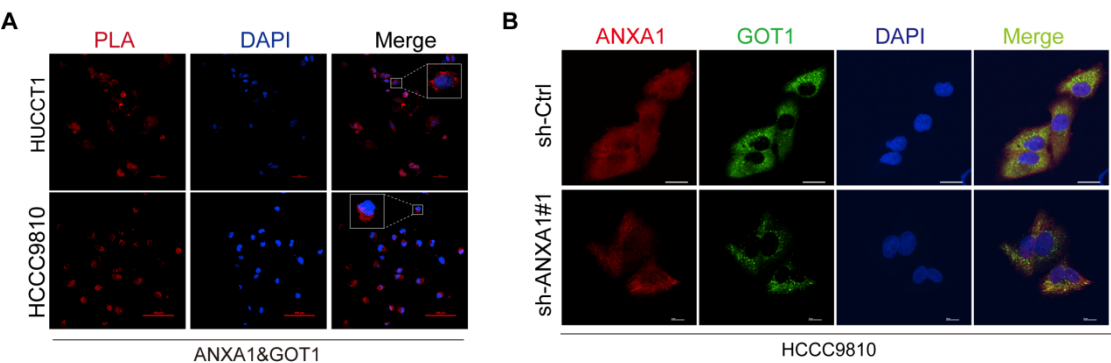

A: PLA signals (red puncta) indicate direct binding between ANXA1 and GOT1 in HUCCT1 and HCCC9810 cells, Nuclei were counterstained with DAPI (blue) (Scale bars, 50 μm/100μm).

B: Immunofluorescence co-localization of ANXA1 and GOT1 in HUCCT1 cells with or without knockdown of ANXA1(Scale bars, 10μm).

**Figure S4**

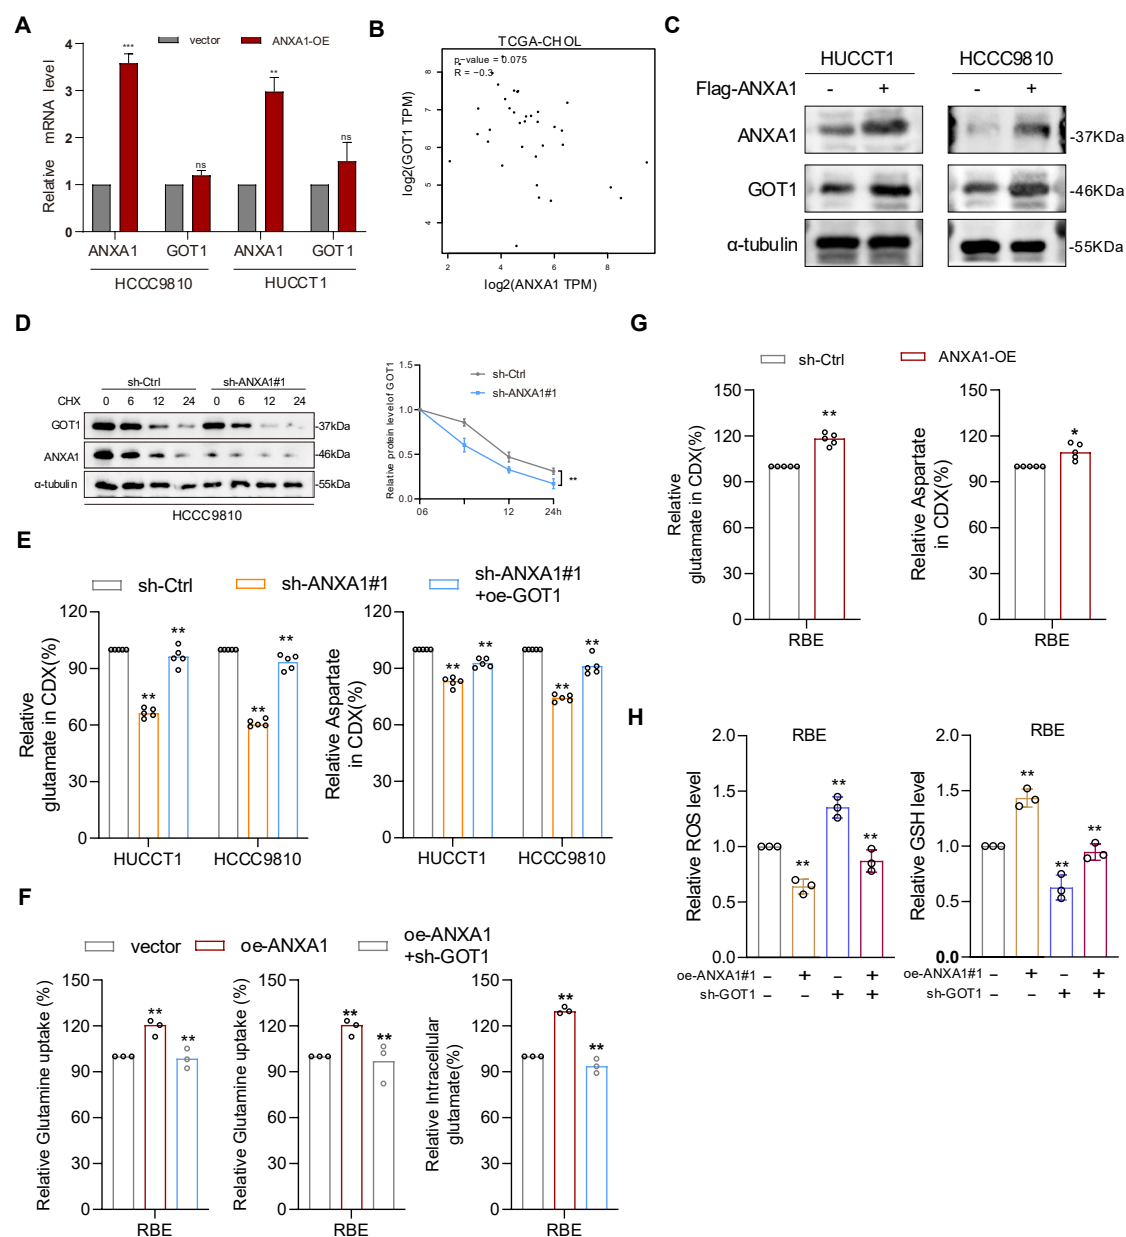

G: Glutamate or aspartate levels were examined in RBE with stable overexpress ANXA1. (Mean values ( $n = 5$ )  $\pm$  s.d.one-way ANOVA, \*\*,  $p < 0.01$ .)

H: ROS and GSH level of RBE detecting with ANXA1 overexpressed and or knockdown GOT1. (Mean values ( $n = 3$ )  $\pm$  s.d.one-way ANOVA, \*\*,  $p < 0.01$ .)

**Figure S5**

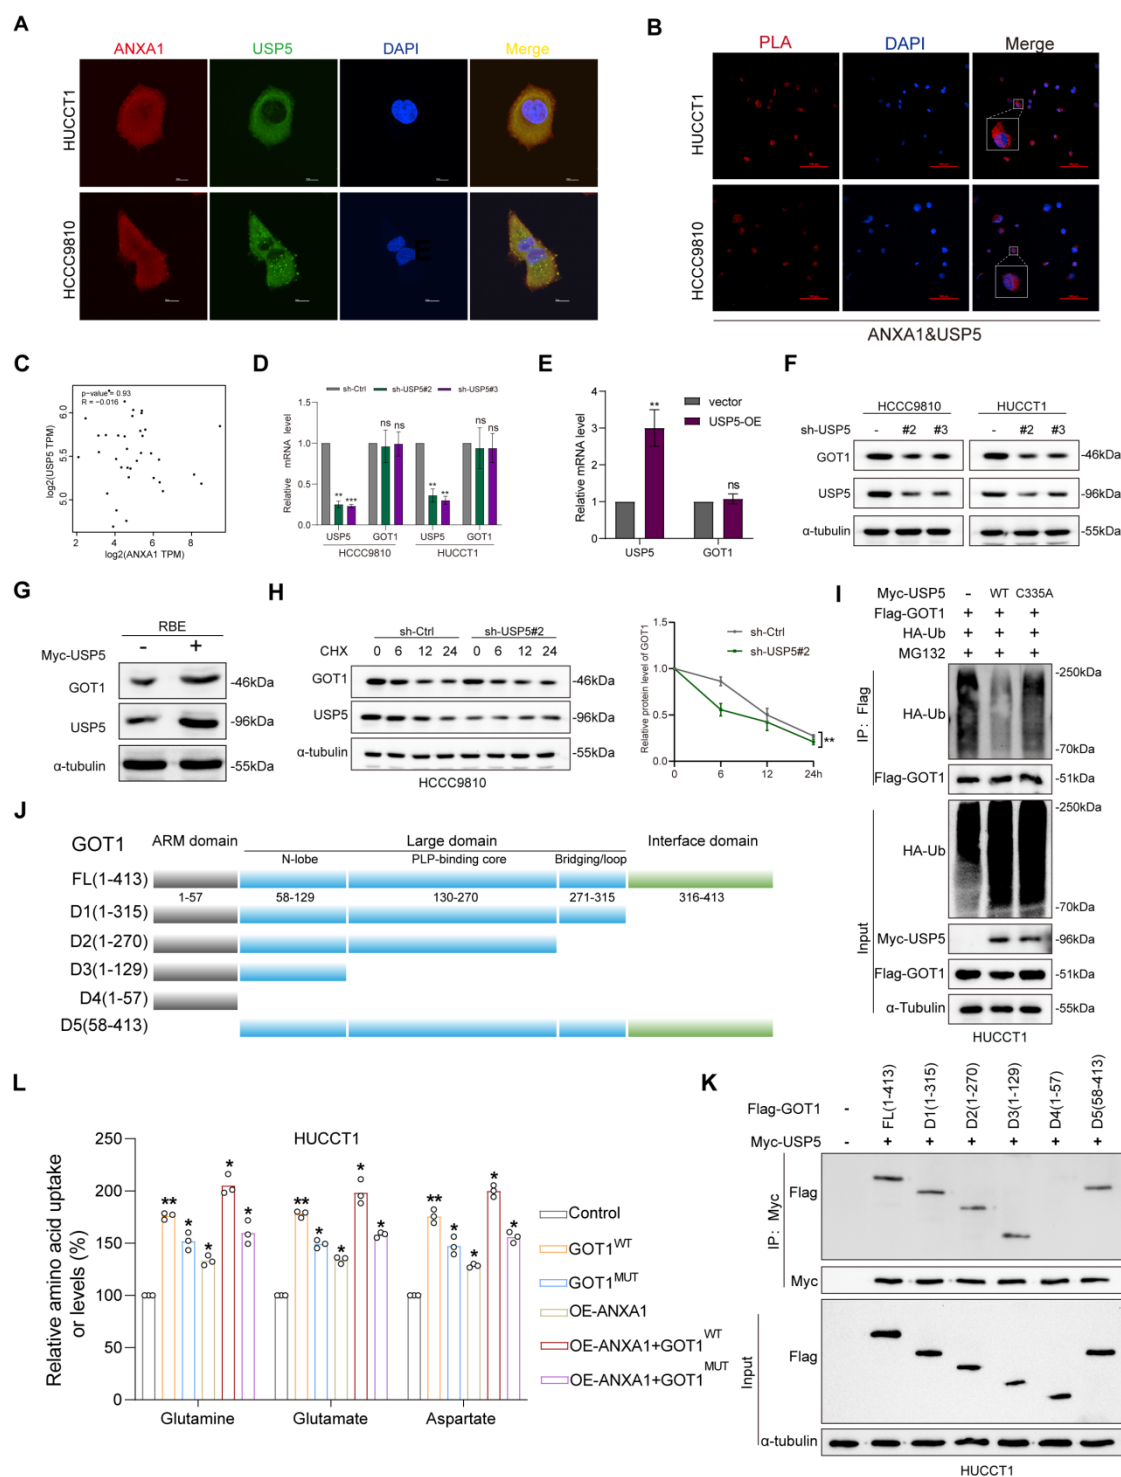

A: Immunofluorescence co-localization of ANXA1 and USP5 in HUCCT1 and HCCC9810 cells.

B: PLA signals (red puncta) indicate direct binding between ANXA1 and USP5 in HUCCT1 and HCCC9810 cells. Nuclei were counterstained with DAPI (blue) (Scale bars, 100  $\mu$ m).

C: Analysis of mRNA expression levels of ANXA1 and USP5 in GEPIA public database.

D: RT-PCR detecting the mRNA levels of GOT1 after knockdown of USP5 in HUCCT1 and HCCC9810 cells. (Mean values (n = 3) ± s.d. Two-way ANOVA, \*\*, p < 0.01; ns, no significance)

E: RT-PCR detecting the mRNA levels of GOT1 after overexpression of USP5 in RBE cells. (Mean values (n = 3) ± s.d. Two-way ANOVA, \*\*, p < 0.01. ns means no significance)

F: IB of GOT1, USP5, and α-Tubulin in HUCCT1 and HCCC9810 cells with USP5 knockdown.

G: IB of GOT1, USP5, and α-Tubulin in RBE cells with USP5 overexpression.

H: Protein levels of GOT1 in HCCC9810 cells with or without USP5 knockdown after CHX treatment (100μg/ml) for the indicated times. (Mean values (n = 3) ± s.d. Two-way ANOVA, \*\*, p < 0.01.)

I: HUCCT1 cells were transfected with Flag-GOT1, HA-tagged ubiquitin (HA-Ub), and either wild-type (WT) or catalytically inactive mutant (C335A) Myc-tagged USP5, followed by treatment with MG132 (10 μM, 6 h). Cell lysates were subjected to immunoprecipitation (IP) using anti-Flag antibody and probed with anti-HA and anti-Flag antibodies to detect ubiquitinated GOT1 and total GOT1 levels.

J: Schematic diagram of truncated GOT1 constructs (D1–D5) used to map the USP5-binding region. The full-length GOT1 (FL, 1–413 aa) contains an ARM domain (1–57), a large domain including the N-lobe (58–129), PLP-binding core (130–270), bridging loop (271–315), and an interface domain (316–413).

K: Co-immunoprecipitation of Myc-USP5 with Flag-tagged full-length or truncated GOT1 constructs in HUCCT1 cells.

L: Quantification of intracellular amino acid levels (glutamine uptake and metabolic derivatives) in HUCCT1 cells transfected with GOT1<sup>WT</sup> or GOT1<sup>MUT</sup>, with or without ANXA1 overexpression. (Mean values (n = 3) ± s.d. One-way ANOVA, \*, p < 0.05; \*\*, p < 0.01.)

**Figure S6**

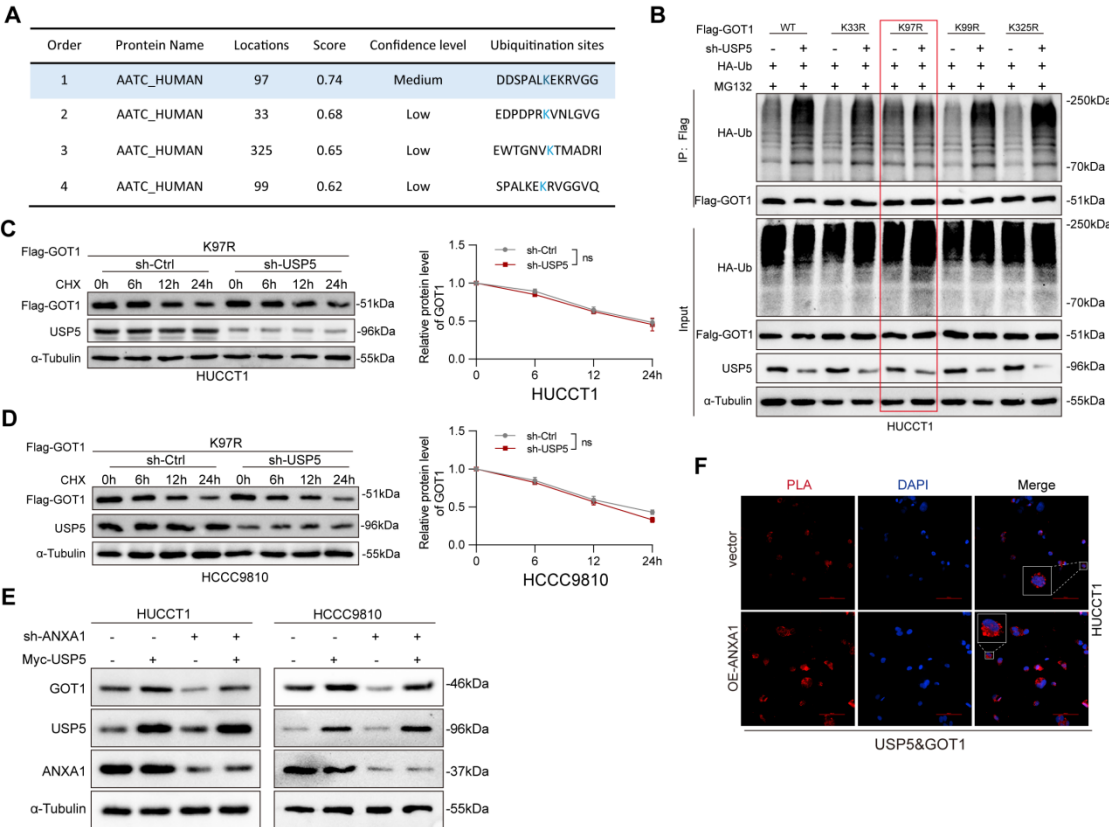

A: Used the MATLAB Compiler Runtime (MCR, version: R2009a MCR 7.10) tool to analyze all lysine residues in the GOT1 amino acid sequence. Lysines with a prediction score  $\geq 0.62$  were considered likely to be ubiquitinated.

B: Site-directed lysine mutants of GOT1 (K33R, K97R, K99R, K325R) or wild-type GOT1 (Flag-GOT1-WT) were transfected into HUCCT1 cells, with or without USP5 knockdown (sh-USP5), along with HA-Ub and MG132. Flag-GOT1 was immunoprecipitated and probed for HA-Ub to assess GOT1 ubiquitination.

C-D: In HUCCT1 and HCCC9810 cells, Flag-tagged GOT1 K97R mutant constructs were transfected with or without USP5 knockdown. Cells were then treated with cycloheximide (CHX, 100  $\mu\text{g}/\text{mL}$ ) to inhibit protein synthesis, and samples were collected at 0, 6, 12, and 24 hours. GOT1 protein levels were assessed by immunoblotting using an anti-Flag antibody, and protein stability was quantified. (mean value( $n=3$ )  $\pm$  sd. Two-way ANOVA; ns, no significance.)

E: Western blot analysis of GOT1, USP5, and ANXA1 protein expression in HUCCT1 and HCCC9810 cells transfected with sh-ANXA1 and/or Myc-USP5 plasmids.

F: PLA signals for USP5–GOT1 interaction in control (top) and ANXA1-overexpressing (OE-ANXA1, bottom) cells (Scale bars, 100  $\mu\text{m}$ ).

**Figure S7**

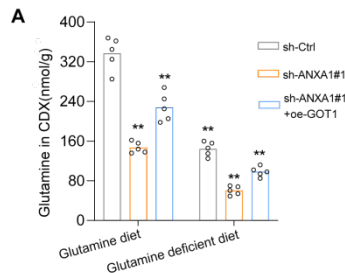

A: Glutamine concentrations were measured in subcutaneous xenograft tumors (CDX) derived from HUCCT1 cells subjected to different treatments: sh-Ctrl, sh-ANXA1#1, and sh-ANXA1#1+oe-GOT1. (mean  $\pm$  s.d ( $n = 5$ ). \*\*,  $p < 0.01$ ; One-way ANOVA
